# Supplementary material
Source: PubMed Central journal article supplement (PMC6939638)
Supplement: NIHMS1063420-supplement-Supplemental.pdf [file NIHMS1063420-supplement-Supplemental.pdf]

## Supplementary Material

### Supplementary figure 1

Microglia morphology was scored in 40  $\mu\text{m}$  thick sections stained with Iba1 as homeostatic, activated and dystrophic. Percent of homeostatic (a, e, i, m, q, u, y), activated (b, f, j, n, r, v, z) and dystrophic (c, g, k, o, s, w, aa) microglia in the indicated anatomical subregions of the hippocampal formation, with each open circle representing the average score for the indicated region/case. Light grey bars represent the mean and red error bars depict  $\pm$  standard error of mean. (d, h, l, p, t, x, bb) Stacked bar graph for anatomical subregions of the hippocampal formation with green bars representing homeostatic microglia, red bars representing activated microglia and black bars representing dystrophic microglia. 1-way ANOVA with Bonferroni posttest was used for statistical analysis. \*  $p < 0.05$ , \*\*  $p < 0.01$ , \*\*\*  $p < 0.001$ .

### Supplementary figure 2

(a) Representative images of CD68 stained sections for hippocampus (upper row), frontal cortex (middle row) and visual cortex (lower row) for the respective experimental groups (listed above images). (b-d) Quantification of % area covered by CD68 staining for hippocampus (b), frontal cortex (c) and visual cortex (d). Each open circle represents one case per experimental group and red error bars depict  $\pm$  standard error of mean. (e-g) Linear correlation of % area covered by CD68 staining and % activated microglia for hippocampus (e;  $r^2 = 0.2453$ ,  $p = 0.0001$ ), frontal cortex (f;  $r^2 = 0.2297$ ,  $p = 0.0009$ ) and visual cortex (g;  $r^2 = 0.1775$ ,  $p = 0.0014$ ). Each symbol represents one case. (h) % area covered by CD68 staining for No AD, High AD (represents combined data for High AD and High AD (Trem2) and PART cases in the hippocampus. Each open circle represents one case per experimental group and red error bars depict  $\pm$  standard error of mean. (i) % area covered by CD68 staining for No AD, High AD (represents combined data for High AD and High AD (Trem2) and Pathological aging cases in the frontal cortex. Each open circle represents one case per experimental group and red error bars depict  $\pm$  standard error of mean. 1-way ANOVA with Bonferroni posttest was used for statistical analysis. \*\*  $p < 0.01$ .

### Supplementary figure 3

(a) Representative overview (upper row) and high magnification (lower row) images of scanned images with annotated cortical regions (frontal cortex) of NAB228 stained slides representing different severity of A $\beta$ -pathology following the commonly used 4-tier scoring system. (b)

Representative overview (upper row) and high magnification (lower row) images of scanned images with annotated cortical regions (frontal cortex) of NAB228 stained slides with representative image of software detected stained area in right images. (c) Representative overview (upper row) and high magnification (lower row) images of scanned images with annotated cortical regions (frontal cortex) of PHF1 stained slides with representative image of software assisted quantification of PHF1-positive neuritic plaques.

#### Supplementary figure 4

(a) Graphical representation of average GeoMx quantification data as fold change in TREM2 over HighAD in mask1 (green bars), mask2 (red bars) and mask3 (yellow bars). Dotted red line indicated fold change of 1. (b) Graphical representation of average GeoMx quantification data as fold change in mask1 over masks2-3 in TREM2 (grey bars) and high AD (black bars).

#### Supplementary figure 5

Average GeoMx protein data normalized to housekeeper and area in high AD and TREM2 for MBP (a), Vcam (b), NMDAR (c), S100B (d) and Calbindin (e). Each red circle represents average data per mask per case. Black and white bars represent the mean for each group and error bars depict the S.E.M. Unpaired t-Test was used for statistical analysis \*\*  $p < 0.01$ , \*\*\*  $p < 0.001$ .

#### Supplementary figure 6

(a) Raw data counts for genes on nCounter neuropathology panel in dependence of postmortem interval. (b) Linear correlation between gene expression data on the nCounter neuropathology panels for FFPE tissue and corresponding frozen tissue for the same case and anatomical region. (c) Volcano plot of differentially expressed genes in TREM2 cases versus control in frontal cortex samples. Conventional qPCR analysis performed on RNA extracted from corresponding frozen tissue samples for the same case and anatomical region for KCNJ (d), TGFb1 (e) and P2RX7 (f). (g, left panel) Cell type score for microglia derived from the Nanostring nCounter system on the Neuropathology panel for High AD and No AD. Each symbol represents one case. (g, right panel) Corresponding histological analysis and representative images used for histological analysis of activated microglia. (h, left panel) Cell type score for neurons derived from the Nanostring nCounter system on the Neuropathology panel for High AD and No AD. Each symbol represents one case. (h, right panel) Representative image of

Western blots for synaptophysin (green) and GapDH (red) in No/Low AD, Int. AD and high AD with corresponding quantification. \*  $p < 0.05$ .

#### Supplementary figure 7

Volcano plot of differentially expressed genes in high AD cases versus control cases in the nCounter neuropathology panel (a, c, e) and Neuroinflammation panel (b, d, e) for frontal cortex samples for hippocampus (a, b), frontal cortex (c, d) and visual cortex (e, f).

#### Supplementary figure 8

Volcano plot of differentially expressed genes in TREM2 cases versus control cases in the nCounter neuropathology panel (a, c, e) and Neuroinflammation panel (b, d, e) for frontal cortex samples for hippocampus (a, b), frontal cortex (c, d) and visual cortex (e, f).

#### Supplementary figure 9

Volcano plot of differentially expressed genes in TREM2 cases versus high AD cases in the nCounter neuropathology panel (a, c, e) and Neuroinflammation panel (b, d, e) for frontal cortex samples for hippocampus (a, b), frontal cortex (c, d) and visual cortex (e, f).

Supplementary table 1  
Overview of cases used in study

|                     | No AD | Low   | Intermed. | High   | High AD<br>(TREM2<br>variant)* | PART | Path.<br>Aging |
|---------------------|-------|-------|-----------|--------|--------------------------------|------|----------------|
| <b>N</b>            | 12    | 14    | 6         | 17     | 17                             | 4    | 12             |
| <b>Mean age</b>     | 65.6  | 70.71 | 83.67     | 78.94  | 76.53                          | 85   | 86.5           |
| <b>Gender (m/f)</b> | 5/7   | 8/6   | 3/3       | 8/9    | 8/9                            | 1/3  | 6/6            |
| <b>ApoE 4</b>       | 5(15) | 4(14) | 4(6)      | 15(18) | 8(16)                          | 0(2) | 2(4)           |
| <b>Mean PMI</b>     | 17    | 16    | 14.33     | 15.66  | 12.82                          | 13.5 | 13.38          |

Supplementary table 2  
Cases used for biochemical analysis

|                | Gender (m/f) | Mean Age | ApoE 3/3 | ApoE 3/4 | ApoE 4/4 |
|----------------|--------------|----------|----------|----------|----------|
| <b>High AD</b> | 3/3          | 81.33    | 1        | 4        | 1        |
| <b>TREM2</b>   | 3/3          | 80       | 2        | 3        | 1        |

Supplementary table 3  
 Top 20 differentially expressed genes in TREM2 versus high AD in Hippocampus  
 (Neuropathology panel)

|                       | Log2<br>fold<br>change | std<br>error<br>(log2) | Lower<br>confidence<br>limit (log2) | Upper<br>confidence<br>limit (log2) | Linear<br>fold<br>change | Lower<br>confidence<br>limit (linear) | Upper<br>confidence<br>limit (linear) | P-<br>val<br>ue | BY-<br>p.va<br>lue | me<br>tho<br>d          | Gene.sets                                                                                                                                                                                           | probe.ID            |
|-----------------------|------------------------|------------------------|-------------------------------------|-------------------------------------|--------------------------|---------------------------------------|---------------------------------------|-----------------|--------------------|-------------------------|-----------------------------------------------------------------------------------------------------------------------------------------------------------------------------------------------------|---------------------|
| SF3B2-<br>mRNA        | 0.398                  | 0.0867                 | 0.228                               | 0.568                               | 1.32                     | 1.17                                  | 1.48                                  | 0.0009          | 1                  | ear<br>log<br>lin       | Transcription and Splicing                                                                                                                                                                          | NM_006842.2:2364    |
| FAM126A-<br>mRNA      | -0.401                 | 0.108                  | -0.612                              | -0.19                               | 0.757                    | 0.654                                 | 0.876                                 | 0.0039          | 1                  | ear<br>log<br>lin       | Growth Factor Signaling, Myelination                                                                                                                                                                | XM_006715799.2:4296 |
| NELFA-<br>mRNA        | -0.324                 | 0.1                    | -0.52                               | -0.128                              | 0.799                    | 0.697                                 | 0.915                                 | 0.0088          | 1                  | ear<br>log<br>lin       | Chromatin Modification                                                                                                                                                                              | NM_005663.3:547     |
| DGKB-<br>mRNA         | -0.231                 | 0.0759                 | -0.38                               | -0.0826                             | 0.852                    | 0.768                                 | 0.944                                 | 0.0123          | 1                  | ear<br>log<br>lin       | Lipid Metabolism                                                                                                                                                                                    | NM_004080.1:680     |
| CDK5R<br>AP3-<br>mRNA | -0.233                 | 0.0806                 | -0.391                              | -0.0751                             | 0.851                    | 0.762                                 | 0.949                                 | 0.0161          | 1                  | ear                     | Disease Association, Unfolded Protein Response<br>Angiogenesis, Apoptosis, Disease Association, Growth Factor<br>Signaling, Oxidative Stress, Transmitter Response and<br>Reuptake, Trophic Factors | NM_005096.2:1402    |
| JUN-<br>mRNA          | -0.541                 | 0.188                  | -0.909                              | -0.173                              | 0.687                    | 0.533                                 | 0.887                                 | 0.0164          | 1                  | Im.<br>nb               |                                                                                                                                                                                                     | NM_002228.3:140     |
| PLEKH<br>O2-<br>mRNA  | -0.37                  | 0.13                   | -0.625                              | -0.115                              | 0.774                    | 0.649                                 | 0.923                                 | 0.0173          | 1                  | Im.<br>nb               | Cytokines                                                                                                                                                                                           | NM_025201.4:2500    |
| SNRPA-<br>mRNA        | -0.309                 | 0.116                  | -0.535                              | -0.082                              | 0.807                    | 0.69                                  | 0.945                                 | 0.0235          | 1                  | Im.<br>nb               | Transcription and Splicing                                                                                                                                                                          | NM_004596.3:456     |
| ACAA1-<br>mRNA        | 0.449                  | 0.173                  | 0.11                                | 0.788                               | 1.37                     | 1.08                                  | 1.73                                  | 0.0267          | 1                  | Im.<br>nb               | Lipid Metabolism                                                                                                                                                                                    | NM_001130410.1:1090 |
| ATM-<br>mRNA          | -0.425                 | 0.165                  | -0.748                              | -0.102                              | 0.745                    | 0.595                                 | 0.931                                 | 0.0273          | 1                  | Im.<br>nb               | Apoptosis, Chromatin Modification, Disease Association,<br>Growth Factor Signaling                                                                                                                  | NM_138292.3:1323    |
| LSM2-<br>mRNA         | -0.449                 | 0.175                  | -0.792                              | -0.106                              | 0.733                    | 0.577                                 | 0.929                                 | 0.0282          | 1                  | Im.<br>nb               | Transcription and Splicing                                                                                                                                                                          | NM_021177.3:325     |
| STX2-<br>mRNA         | -0.32                  | 0.126                  | -0.567                              | -0.0724                             | 0.801                    | 0.675                                 | 0.951                                 | 0.0297          | 1                  | Im.<br>nb               | Neural Connectivity, Oxidative Stress, Transmitter Synthesis<br>and Storage, Vesicle Trafficking                                                                                                    | NM_194356.2:440     |
| MAPK<br>3-<br>mRNA    | -0.269                 | 0.109                  | -0.482                              | -0.0556                             | 0.83                     | 0.716                                 | 0.962                                 | 0.033           | 1                  | Im.<br>nb               | Apoptosis, Chromatin Modification, Disease Association,<br>Growth Factor Signaling, Transmitter Release, Transmitter<br>Response and Reuptake, Trophic Factors                                      | NM_001040056.1:580  |
| PLA2G<br>16-<br>mRNA  | -0.424                 | 0.172                  | -0.761                              | -0.0859                             | 0.746                    | 0.59                                  | 0.942                                 | 0.0338          | 1                  | Im.<br>nb               | Growth Factor Signaling, Lipid Metabolism                                                                                                                                                           | NM_007069.3:847     |
| PMP22-<br>mRNA        | -0.497                 | 0.207                  | -0.902                              | -0.0926                             | 0.708                    | 0.535                                 | 0.938                                 | 0.0368          | 1                  | Im.<br>nb<br>log<br>lin | Myelination, Vesicle Trafficking                                                                                                                                                                    | NM_000304.3:417     |
| SIRT1-<br>mRNA        | -0.245                 | 0.102                  | -0.445                              | -0.045                              | 0.844                    | 0.735                                 | 0.969                                 | 0.0372          | 1                  | ear                     | Angiogenesis, Carbohydrate Metabolism, Chromatin<br>Modification, Disease Association, Oxidative Stress                                                                                             | NM_012238.4:840     |
| PSMB9-<br>mRNA        | -0.402                 | 0.168                  | -0.73                               | -0.073                              | 0.757                    | 0.603                                 | 0.951                                 | 0.0376          | 1                  | Im.<br>nb               | Activated Microglia, Disease Association, Unfolded Protein<br>Response                                                                                                                              | NM_002800.4:455     |
| ATP2B<br>3-<br>mRNA   | 0.423                  | 0.188                  | 0.054                               | 0.791                               | 1.34                     | 1.04                                  | 1.73                                  | 0.0484          | 1                  | Im.<br>nb               | Transmitter Release, Transmitter Response and Reuptake                                                                                                                                              | NM_001001344.2:1280 |
| NTNG1-<br>mRNA        | 1.11                   | 0.495                  | 0.139                               | 2.08                                | 2.16                     | 1.1                                   | 4.22                                  | 0.0489          | 1                  | Im.<br>nb               | Disease Association, Growth Factor Signaling, Tissue Integrity                                                                                                                                      | NM_014917.2:160     |
| DDIT3-<br>mRNA        | -0.43                  | 0.193                  | -0.808                              | -0.0525                             | 0.742                    | 0.571                                 | 0.964                                 | 0.0496          | 1                  | Im.<br>nb               | Apoptosis, Disease Association, Growth Factor Signaling,<br>Oxidative Stress, Unfolded Protein Response                                                                                             | NM_004083.4:40      |

Supplementary table 4  
 Top 20 differentially expressed genes in TREM2 versus high AD in frontal cortex  
 (Neuropathology panel)

|                                                               | Log2<br>fold<br>change | std<br>error<br>(log2) | Lower<br>confidence<br>limit (log2) | Upper<br>confidence<br>limit (log2) | Linear<br>fold<br>change | Lower<br>confidence<br>limit (linear) | Upper<br>confidence<br>limit (linear) | P-<br>val<br>ue             | BY.<br>p.va<br>lue | me<br>tho<br>d           | Gene.sets                                                                                                                                                                                                                                               | probe.ID                                                 |
|---------------------------------------------------------------|------------------------|------------------------|-------------------------------------|-------------------------------------|--------------------------|---------------------------------------|---------------------------------------|-----------------------------|--------------------|--------------------------|---------------------------------------------------------------------------------------------------------------------------------------------------------------------------------------------------------------------------------------------------------|----------------------------------------------------------|
| KATNA<br>1-<br>mRNA                                           | -0.356                 | 0.094<br>3             | -0.541                              | -0.171                              | 0.781                    | 0.687                                 | 0.888                                 | 0.0<br>04<br>36<br>0.0      | 1                  | Wal<br>d<br>logl<br>ine  | Axon and Dendrite Structure, Neuronal Cytoskeleton                                                                                                                                                                                                      | NM_0012<br>04076.1:4<br>06<br>NM_0010<br>02257.1:3<br>26 |
| LCLAT1<br>-mRNA                                               | -0.251                 | 0.069<br>4             | -0.387                              | -0.115                              | 0.84                     | 0.765                                 | 0.923                                 | 0.0<br>06<br>93<br>0.0      | 1                  | ar                       | Lipid Metabolism<br>Axon and Dendrite Structure, Neural Connectivity,<br>Transmitter Release, Transmitter Synthesis and Storage,<br>Vesicle Trafficking                                                                                                 | NM_0008<br>18.2:1245                                     |
| GAD2-<br>mRNA                                                 | 0.448                  | 0.132                  | 0.189                               | 0.708                               | 1.36                     | 1.14                                  | 1.63                                  | 0.0<br>07<br>17<br>0.0      | 1                  | Im.<br>nb<br>logl<br>ine | Axon and Dendrite Structure, Chromatin Modification,<br>Disease Association, Myelination, Oxidative Stress<br>Neural Connectivity, Transmitter Release, Transmitter<br>Response and Reuptake, Transmitter Synthesis and<br>Storage, Vesicle Trafficking | NM_0122<br>37.3:610                                      |
| SIRT2-<br>mRNA<br>CHRNA<br>2-<br>mRNA<br>ATP13<br>A2-<br>mRNA | -0.321                 | 0.095<br>5             | -0.509                              | -0.134                              | 0.8                      | 0.703                                 | 0.911                                 | 0.0<br>07<br>17<br>0.0      | 1                  | ar                       | Axon and Dendrite Structure, Chromatin Modification,<br>Disease Association, Myelination, Oxidative Stress<br>Neural Connectivity, Transmitter Release, Transmitter<br>Response and Reuptake, Transmitter Synthesis and<br>Storage, Vesicle Trafficking | NM_0007<br>48.2:3865<br>NM_0011<br>41974.1:9<br>25       |
| RHOA-<br>mRNA                                                 | 0.337                  | 0.108                  | 0.125                               | 0.549                               | 1.26                     | 1.09                                  | 1.46                                  | 0.0<br>10<br>9<br>0.0       | 1                  | Im.<br>nb                | Angiogenesis, Growth Factor Signaling, Transmitter<br>Response and Reuptake, Trophic Factors                                                                                                                                                            | NM_0016<br>64.2:1230<br>NM_0012<br>78463.1:1<br>396      |
| DNM1L<br>-mRNA<br>ATP5V<br>OE2-<br>mRNA                       | 0.301                  | 0.099<br>3             | 0.106                               | 0.495                               | 1.23                     | 1.08                                  | 1.41                                  | 0.0<br>12<br>7<br>0.0       | 1                  | Im.<br>nb                | Activated Microglia, Neural Connectivity                                                                                                                                                                                                                | NR_1106<br>12.1:2509                                     |
| ATM-<br>mRNA                                                  | -0.308                 | 0.109                  | -0.521                              | -0.0947                             | 0.808                    | 0.697                                 | 0.936                                 | 0.0<br>13<br>7<br>0.0       | 1                  | Im.<br>nb<br>logl<br>ine | Apoptosis, Chromatin Modification, Disease Association,<br>Growth Factor Signaling                                                                                                                                                                      | NM_1382<br>92.2:1323                                     |
| SPAST-<br>mRNA                                                | -0.241                 | 0.086<br>3             | -0.41                               | -0.072                              | 0.846                    | 0.753                                 | 0.951                                 | 0.0<br>19<br>0.0            | 1                  | ar                       | Axon and Dendrite Structure                                                                                                                                                                                                                             | NM_0149<br>46.3:698                                      |
| NEFH-<br>mRNA                                                 | 0.832                  | 0.299                  | 0.247                               | 1.42                                | 1.78                     | 1.19                                  | 2.67                                  | 0.0<br>19<br>2<br>0.0       | 1                  | Im.<br>nb                | Axon and Dendrite Structure, Disease Association, Neuronal<br>Cytoskeleton, Oxidative Stress                                                                                                                                                            | NM_0210<br>76.3:1350                                     |
| NELL2-<br>mRNA                                                | 0.449                  | 0.164                  | 0.128                               | 0.771                               | 1.37                     | 1.09                                  | 1.71                                  | 0.0<br>20<br>9<br>0.0       | 1                  | Im.<br>nb                | Axon and Dendrite Structure                                                                                                                                                                                                                             | NM_0061<br>59.1:180                                      |
| SF3B2-<br>mRNA                                                | 0.303                  | 0.113                  | 0.0805                              | 0.525                               | 1.23                     | 1.06                                  | 1.44                                  | 0.0<br>23<br>5<br>0.0       | 1                  | Im.<br>nb                | Transcription and Splicing<br>Disease Association, Neural Connectivity, Transmitter<br>Release, Transmitter Response and Reuptake, Vesicle<br>Trafficking                                                                                               | NM_0068<br>42.2:2364<br>NM_0025<br>62.5:780              |
| P2RX7-<br>mRNA<br>SH3TC<br>2-<br>mRNA                         | -0.369                 | 0.139                  | -0.641                              | -0.0962                             | 0.775                    | 0.641                                 | 0.935                                 | 0.0<br>24<br>2<br>0.0       | 1                  | Im.<br>nb                | Myelination<br>Apoptosis, Carbohydrate Metabolism, Growth Factor<br>Signaling, Transmitter Release, Transmitter Response and<br>Reuptake, Trophic Factors                                                                                               | NM_0245<br>77.3:2178<br>NM_0054<br>65.4:287              |
| AKT3-<br>mRNA<br>CDK5R<br>AP3-<br>mRNA                        | -0.475                 | 0.188                  | -0.843                              | -0.107                              | 0.719                    | 0.557                                 | 0.929                                 | 0.0<br>25<br>6<br>0.0       | 1                  | Im.<br>nb                | Disease Association, Unfolded Protein Response<br>Angiogenesis, Apoptosis, Disease Association, Growth<br>Factor Signaling, Oxidative Stress, Transmitter Response<br>and Reuptake, Trophic Factors                                                     | NM_1760<br>96.2:1402<br>NM_0022<br>28.3:140              |
| JUN-<br>mRNA                                                  | -0.378                 | 0.152                  | -0.676                              | -0.0804                             | 0.769                    | 0.626                                 | 0.946                                 | 0.0<br>29<br>9<br>0.0       | 1                  | Im.<br>nb                | Activated Microglia, Autophagy                                                                                                                                                                                                                          | NM_0001<br>52.3:3166                                     |
| GAA-<br>mRNA                                                  | 0.291                  | 0.119                  | 0.0566                              | 0.524                               | 1.22                     | 1.04                                  | 1.44                                  | 0.0<br>32<br>0.0<br>35<br>2 | 1                  | Im.<br>nb                |                                                                                                                                                                                                                                                         |                                                          |

Supplementary table 5  
 Top 20 differentially expressed genes in TREM2 versus high AD in visual cortex  
 (Neuropathology panel)

|                                                                                                                                                         | Log2<br>fold<br>change | std<br>error<br>(log2) | Lower<br>confidence<br>limit (log2) | Upper<br>confidence<br>limit (log2) | Linear<br>fold<br>change | Lower<br>confidence<br>limit (linear) | Upper<br>confidence<br>limit (linear) | P-<br>val<br>ue  | BY.<br>p.va<br>lue | me<br>tho<br>d<br>logl<br>ine<br>ar | Gene.sets                                                                                                                                                | probe.ID                                                                                                                                                                                                                                                                                                                                                                                                                                                                                                                                                                |
|---------------------------------------------------------------------------------------------------------------------------------------------------------|------------------------|------------------------|-------------------------------------|-------------------------------------|--------------------------|---------------------------------------|---------------------------------------|------------------|--------------------|-------------------------------------|----------------------------------------------------------------------------------------------------------------------------------------------------------|-------------------------------------------------------------------------------------------------------------------------------------------------------------------------------------------------------------------------------------------------------------------------------------------------------------------------------------------------------------------------------------------------------------------------------------------------------------------------------------------------------------------------------------------------------------------------|
| PPP3C<br>C-<br>mRNA                                                                                                                                     | 0.296                  | 0.069<br>4             | 0.16                                | 0.433                               | 1.23                     | 1.12                                  | 1.35                                  | 0.01<br>63       | 1                  |                                     | Disease Association, Growth Factor Signaling, Transmitter Release, Transmitter Response and Reuptake                                                     | NM_005<br>605.4:10<br>58<br>NM_013<br>959.2:14<br>05<br>NR_1106<br>12.1:250<br>9<br>NM_001<br>278463.1<br>:1396<br>NM_001<br>204076.1<br>:406<br>NM_014<br>917.2:16<br>0<br>NM_000<br>304.3:41<br>7<br>NM_007<br>069.3:84<br>7<br>NM_004<br>428.2:65<br>0<br>NM_000<br>067.2:57<br>5<br>NM_212<br>535.1:17<br>50<br>NM_015<br>184.5:27<br>85<br>NM_000<br>832.5:12<br>90<br>NM_000<br>833.3:44<br>97<br>NM_012<br>237.3:61<br>0<br>NM_003<br>632.2:40<br>50<br>NM_001<br>207015.1<br>:642<br>NM_020<br>988.2:14<br>22<br>NM_006<br>842.2:23<br>64<br>NM_000<br>719.6:40 |
| NRG1-<br>mRNA<br>ATP6V<br>OE2-<br>mRNA<br>DNM1<br>L-<br>mRNA<br>KATNA<br>1-<br>mRNA<br>NTNG<br>1-<br>mRNA<br>PMP2<br>2-<br>mRNA<br>PLA2G<br>16-<br>mRNA | 0.635                  | 0.167                  | 0.308                               | 0.963                               | 1.55                     | 1.24                                  | 1.95                                  | 0.0<br>03<br>5   | 1                  | Im.<br>nb                           | Axon and Dendrite Structure, Growth Factor Signaling, Myelination, Neural Connectivity                                                                   |                                                                                                                                                                                                                                                                                                                                                                                                                                                                                                                                                                         |
|                                                                                                                                                         | 0.448                  | 0.131                  | 0.19                                | 0.706                               | 1.36                     | 1.14                                  | 1.63                                  | 0.0<br>06<br>67  | 1                  | Im.<br>nb                           | Transmitter Synthesis and Storage                                                                                                                        |                                                                                                                                                                                                                                                                                                                                                                                                                                                                                                                                                                         |
|                                                                                                                                                         | 0.426                  | 0.13                   | 0.171                               | 0.681                               | 1.34                     | 1.13                                  | 1.6                                   | 0.0<br>32        | 1                  | Im.<br>nb                           | Activated Microglia, Neural Connectivity                                                                                                                 |                                                                                                                                                                                                                                                                                                                                                                                                                                                                                                                                                                         |
|                                                                                                                                                         | -0.376                 | 0.115                  | -0.602                              | -0.149                              | 0.771                    | 0.659                                 | 0.902                                 | 0.0<br>09<br>95  | 1                  | Wa<br>ld                            | Axon and Dendrite Structure, Neuronal Cytoskeleton                                                                                                       |                                                                                                                                                                                                                                                                                                                                                                                                                                                                                                                                                                         |
|                                                                                                                                                         | 0.788                  | 0.25                   | 0.298                               | 1.28                                | 1.73                     | 1.23                                  | 2.42                                  | 0.0<br>3         | 1                  | nb                                  | Disease Association, Growth Factor Signaling, Tissue Integrity                                                                                           |                                                                                                                                                                                                                                                                                                                                                                                                                                                                                                                                                                         |
|                                                                                                                                                         | -0.781                 | 0.252                  | -1.28                               | -0.287                              | 0.582                    | 0.413                                 | 0.82                                  | 0.0<br>11<br>3   | 1                  | Im.<br>nb                           | Myelination, Vesicle Trafficking                                                                                                                         |                                                                                                                                                                                                                                                                                                                                                                                                                                                                                                                                                                         |
|                                                                                                                                                         | -0.829                 | 0.281                  | -1.38                               | -0.279                              | 0.563                    | 0.384                                 | 0.824                                 | 0.0<br>14<br>5   | 1                  | Im.<br>nb                           | Growth Factor Signaling, Lipid Metabolism                                                                                                                |                                                                                                                                                                                                                                                                                                                                                                                                                                                                                                                                                                         |
| EFNA1<br>-mRNA                                                                                                                                          | -0.68                  | 0.232                  | -1.14                               | -0.225                              | 0.624                    | 0.455                                 | 0.856                                 | 0.0<br>15<br>1   | 1                  | Im.<br>nb                           | Angiogenesis, Disease Association, Growth Factor Signaling, Tissue Integrity                                                                             |                                                                                                                                                                                                                                                                                                                                                                                                                                                                                                                                                                         |
| CA2-<br>mRNA                                                                                                                                            | -0.596                 | 0.204                  | -0.997                              | -0.196                              | 0.662                    | 0.501                                 | 0.873                                 | 0.0<br>15<br>4   | 1                  | Im.<br>nb                           | Axon and Dendrite Structure, Disease Association, Vesicle Trafficking                                                                                    |                                                                                                                                                                                                                                                                                                                                                                                                                                                                                                                                                                         |
| PRKCB<br>-mRNA                                                                                                                                          | 0.462                  | 0.16                   | 0.149                               | 0.775                               | 1.38                     | 1.11                                  | 1.71                                  | 0.0<br>16<br>0.0 | 1                  | Im.<br>nb                           | Angiogenesis, Chromatin Modification, Growth Factor Signaling, Transmitter Release, Transmitter Response and Reuptake                                    |                                                                                                                                                                                                                                                                                                                                                                                                                                                                                                                                                                         |
| PLCL2-<br>mRNA                                                                                                                                          | 0.386                  | 0.139                  | 0.114                               | 0.658                               | 1.31                     | 1.08                                  | 1.58                                  | 0.0<br>19<br>5   | 1                  | Im.<br>nb                           | Activated Microglia, Vesicle Trafficking                                                                                                                 |                                                                                                                                                                                                                                                                                                                                                                                                                                                                                                                                                                         |
| GRIN1-<br>mRNA<br>GRIN2<br>A-<br>mRNA                                                                                                                   | 0.679                  | 0.247                  | 0.195                               | 1.16                                | 1.6                      | 1.14                                  | 2.24                                  | 0.0<br>20<br>5   | 1                  | Im.<br>nb                           | Axon and Dendrite Structure, Disease Association, Neural Connectivity, Transmitter Release, Transmitter Response and Reuptake, Vesicle Trafficking       |                                                                                                                                                                                                                                                                                                                                                                                                                                                                                                                                                                         |
|                                                                                                                                                         | 0.682                  | 0.248                  | 0.195                               | 1.17                                | 1.6                      | 1.15                                  | 2.25                                  | 0.0<br>20<br>6   | 1                  | Im.<br>nb                           | Disease Association, Neural Connectivity, Transmitter Release, Transmitter Response and Reuptake, Transmitter Synthesis and Storage, Vesicle Trafficking |                                                                                                                                                                                                                                                                                                                                                                                                                                                                                                                                                                         |
| SIRT2-<br>mRNA<br>CNTN<br>APT1-<br>mRNA                                                                                                                 | -0.467                 | 0.173                  | -0.806                              | -0.128                              | 0.724                    | 0.572                                 | 0.915                                 | 0.0<br>22<br>3   | 1                  | Im.<br>nb                           | Axon and Dendrite Structure, Chromatin Modification, Disease Association, Myelination, Oxidative Stress                                                  |                                                                                                                                                                                                                                                                                                                                                                                                                                                                                                                                                                         |
|                                                                                                                                                         | 0.422                  | 0.157                  | 0.116                               | 0.729                               | 1.34                     | 1.08                                  | 1.66                                  | 0.0<br>22<br>4   | 1                  | Im.<br>nb                           | Axon and Dendrite Structure, Myelination, Tissue Integrity                                                                                               |                                                                                                                                                                                                                                                                                                                                                                                                                                                                                                                                                                         |
| PTPRR<br>-mRNA<br>GNAO<br>1-<br>mRNA                                                                                                                    | 0.365                  | 0.136                  | 0.0985                              | 0.631                               | 1.29                     | 1.07                                  | 1.55                                  | 0.0<br>22<br>9   | 1                  | Im.<br>nb                           | Disease Association, Growth Factor Signaling                                                                                                             |                                                                                                                                                                                                                                                                                                                                                                                                                                                                                                                                                                         |
|                                                                                                                                                         | -0.372                 | 0.139                  | -0.643                              | -0.0999                             | 0.773                    | 0.64                                  | 0.933                                 | 0.0<br>23<br>1   | 1                  | Im.<br>nb                           | Axon and Dendrite Structure, Oxidative Stress, Transmitter Release, Transmitter Response and Reuptake                                                    |                                                                                                                                                                                                                                                                                                                                                                                                                                                                                                                                                                         |
| SF3B2-<br>mRNA<br>CACNA<br>1C-<br>mRNA                                                                                                                  | 0.268                  | 0.101                  | 0.0705                              | 0.466                               | 1.2                      | 1.05                                  | 1.38                                  | 0.0<br>24<br>0.0 | 1                  | Im.<br>nb                           | Transcription and Splicing                                                                                                                               |                                                                                                                                                                                                                                                                                                                                                                                                                                                                                                                                                                         |
|                                                                                                                                                         | 0.622                  | 0.237                  | 0.157                               | 1.09                                | 1.54                     | 1.12                                  | 2.12                                  | 0.0<br>25<br>4   | 1                  | Im.<br>nb                           | Disease Association, Growth Factor Signaling, Neural Connectivity, Transmitter Release, Transmitter Response and Reuptake                                |                                                                                                                                                                                                                                                                                                                                                                                                                                                                                                                                                                         |

Supplementary table 6  
 Top 20 differentially expressed genes in TREM2 versus high AD in hippocampus  
 (Neuroinflammation panel)

|             | Log2<br>fold<br>change | std<br>error<br>(log2) | Lower<br>confidence<br>limit (log2) | Upper<br>confidence<br>limit (log2) | Linear<br>fold<br>change | Lower<br>confidence<br>limit (linear) | Upper<br>confidence<br>limit (linear) | P-<br>val<br>ue | BY.p<br>.valu<br>e | met<br>hod<br>logli<br>nea<br>r | Gene.sets                                                                                      | probe.ID            |
|-------------|------------------------|------------------------|-------------------------------------|-------------------------------------|--------------------------|---------------------------------------|---------------------------------------|-----------------|--------------------|---------------------------------|------------------------------------------------------------------------------------------------|---------------------|
| RB1CC1-mRNA | -0.366                 | 0.115                  | -0.592                              | -0.139                              | 0.776                    | 0.663                                 | 0.908                                 | 0.0089          | 1                  |                                 | Autophagy, Cellular Stress                                                                     | NM_001083617.1:1860 |
| P2RY12-mRNA | 0.52                   | 0.171                  | 0.186                               | 0.854                               | 1.43                     | 1.14                                  | 1.81                                  | 0.011           | 1                  | Im.nb                           | All DAM, Homeostatic Microglia, Microglia Function, Stage 1 DAM                                | NM_022788.3:230     |
| CSF3R-mRNA  | 0.64                   | 0.212                  | 0.224                               | 1.05                                | 1.56                     | 1.17                                  | 2.08                                  | 0.0117          | 1                  | Im.nb                           | Cytokine Signaling, Growth Factor Signaling                                                    | NM_000760.3:2066    |
| ITGA7-mRNA  | 0.478                  | 0.169                  | 0.146                               | 0.809                               | 1.39                     | 1.11                                  | 1.75                                  | 0.0165          | 1                  | Im.nb                           | Astrocyte Function, Growth Factor Signaling, Matrix Remodeling                                 | NM_002206.1:1170    |
| ITGAX-mRNA  | 0.741                  | 0.263                  | 0.225                               | 1.26                                | 1.67                     | 1.17                                  | 2.39                                  | 0.0168          | 1                  | Im.nb                           | All DAM, Matrix Remodeling, Microglia Function, Stage 2 DAM                                    | NM_000887.4:561     |
| MAN2B1-mRNA | 0.458                  | 0.164                  | 0.136                               | 0.779                               | 1.37                     | 1.1                                   | 1.72                                  | 0.0175          | 1                  | Im.nb                           | Microglia Function                                                                             | NM_001173498.1:380  |
| ATG14-mRNA  | 0.297                  | 0.109                  | 0.0839                              | 0.511                               | 1.23                     | 1.06                                  | 1.43                                  | 0.0196          | 1                  |                                 | Autophagy, Cellular Stress                                                                     | NM_014924.3:4520    |
| CALR-mRNA   | -0.406                 | 0.151                  | -0.703                              | -0.109                              | 0.755                    | 0.614                                 | 0.927                                 | 0.0213          | 1                  | Im.nb                           | Adaptive Immune Response, Autophagy, Neurons and Neurotransmission                             | NM_004343.2:965     |
| TNFSF4-mRNA | 0.382                  | 0.157                  | 0.0745                              | 0.689                               | 1.3                      | 1.05                                  | 1.61                                  | 0.0351          | 1                  | Wal.d                           | Cytokine Signaling, Inflammatory Signaling, NF-kB                                              | NM_003326.2:545     |
| FADD-mRNA   | 0.478                  | 0.198                  | 0.0903                              | 0.866                               | 1.39                     | 1.06                                  | 1.82                                  | 0.0363          | 1                  | Wal.d                           | Apoptosis, Innate Immune Response                                                              | NM_003824.2:1560    |
| FLT1-mRNA   | -0.846                 | 0.38                   | -1.59                               | -0.101                              | 0.556                    | 0.332                                 | 0.932                                 | 0.0479          | 1                  | Im.nb                           | Angiogenesis, Cytokine Signaling, Growth Factor Signaling, Microglia Function                  | NM_002019.4:530     |
| IFNAR1-mRNA | -0.41                  | 0.19                   | -0.783                              | -0.0381                             | 0.752                    | 0.581                                 | 0.974                                 | 0.0536          | 1                  | Im.nb                           | Cytokine Signaling, Growth Factor Signaling, Inflammatory Signaling, Innate Immune Response    | NM_000629.2:782     |
| VEGFA-mRNA  | -0.999                 | 0.462                  | -1.91                               | -0.0926                             | 0.5                      | 0.267                                 | 0.938                                 | 0.0537          | 1                  | Im.nb                           | Angiogenesis, Cellular Stress, Cytokine Signaling, Growth Factor Signaling, Microglia Function | NM_001025366.1:1325 |
| TLR2-mRNA   | 0.431                  | 0.2                    | 0.0397                              | 0.823                               | 1.35                     | 1.03                                  | 1.77                                  | 0.0538          | 1                  | Im.nb                           | Growth Factor Signaling, Innate Immune Response, Microglia Function                            | NM_003264.3:2402    |
| DAPK1-mRNA  | 0.292                  | 0.136                  | 0.0262                              | 0.559                               | 1.22                     | 1.02                                  | 1.47                                  | 0.0544          | 1                  | Im.nb                           | Apoptosis, Autophagy                                                                           | NM_001288729.1:1810 |
| PTEN-mRNA   | -0.193                 | 0.0914                 | -0.372                              | -0.0139                             | 0.875                    | 0.773                                 | 0.99                                  | 0.0584          | 1                  | logli.nea.r                     | Adaptive Immune Response, Autophagy, DNA Damage, Growth Factor Signaling, Lipid Metabolism     | NM_000314.3:1675    |
| CDKN1C-mRNA | 0.462                  | 0.225                  | 0.0209                              | 0.903                               | 1.38                     | 1.01                                  | 1.87                                  | 0.0647          | 1                  | Im.nb                           | Cell Cycle, DNA Damage                                                                         | NM_001122631.1:1102 |
| MAG-mRNA    | 0.64                   | 0.322                  | 0.00945                             | 1.27                                | 1.56                     | 1.01                                  | 2.41                                  | 0.0721          | 1                  | Im.nb                           | Growth Factor Signaling, Matrix Remodeling, Oligodendrocyte Function                           | NM_001199216.1:2250 |
| RPL28-mRNA  | -0.354                 | 0.181                  | -0.709                              | 0.00141                             | 0.782                    | 0.612                                 | 1                                     | 0.0768          | 1                  | Im.nb                           | Microglia Function                                                                             | NM_000991.3:70      |
| IFITM2-mRNA | -0.557                 | 0.285                  | -1.12                               | 0.00222                             | 0.68                     | 0.461                                 | 1                                     | 0.0768          | 1                  | Im.nb                           | Adaptive Immune Response, Inflammatory Signaling                                               | NM_006435.2:390     |



Supplementary table 7

Top 20 differentially expressed genes in TREM2 versus high AD in frontal cortex (Neuroinflammation panel)

|                    | Log2 fold change | std error (log2) | Lower confidence limit (log2) | Upper confidence limit (log2) | Linear fold change | Lower confidence limit (linear) | Upper confidence limit (linear) | P-value | BY.p-value | method     | Gene.sets                                                                                                                                                                            | probe.ID                |
|--------------------|------------------|------------------|-------------------------------|-------------------------------|--------------------|---------------------------------|---------------------------------|---------|------------|------------|--------------------------------------------------------------------------------------------------------------------------------------------------------------------------------------|-------------------------|
| COTL1<br>-<br>mRNA | 0.338            | 0.0938           | 0.154                         | 0.521                         | 1.26               | 1.11                            | 1.44                            | 0.015   | 1          | Im.<br>nb  | Microglia Function                                                                                                                                                                   | NM_0211<br>49.2:1200    |
| BRD2-<br>mRNA      | 0.283            | 0.082            | 0.123                         | 0.444                         | 1.22               | 1.09                            | 1.36                            | 0.0215  | 1          | Im.<br>nb  | Epigenetic Regulation                                                                                                                                                                | NM_0051<br>52.2:1890    |
| MBD2<br>-<br>mRNA  | 0.224            | 0.0724           | 0.0819                        | 0.366                         | 1.17               | 1.06                            | 1.29                            | 0.0515  | 1          | Im.<br>nb  | Epigenetic Regulation<br>Adaptive Immune Response, Cellular Stress, Growth Factor Signaling, Innate Immune Response, Neurons and Neurotransmission                                   | NM_0039<br>27.3:745     |
| FOS-<br>mRNA       | 1.42             | 0.504            | 0.427                         | 2.4                           | 2.67               | 1.34                            | 5.3                             | 0.01    | 1          | Im.<br>nb  | Neurotransmission                                                                                                                                                                    | NM_0052<br>52.2:1475    |
| SIN3A<br>-<br>mRNA | 0.284            | 0.102            | 0.0847                        | 0.483                         | 1.22               | 1.06                            | 1.4                             | 0.03    | 1          | Im.<br>nb  | Epigenetic Regulation                                                                                                                                                                | NM_0154<br>77.1:1605    |
| KDMS<br>A-<br>mRNA | 0.181            | 0.0674           | 0.0492                        | 0.313                         | 1.13               | 1.03                            | 1.24                            | 0.013   | 1          | logl<br>ar | Epigenetic Regulation                                                                                                                                                                | NM_0010<br>42603.1:1962 |
| PADI2<br>-<br>mRNA | 0.414            | 0.161            | 0.0984                        | 0.729                         | 1.33               | 1.07                            | 1.66                            | 0.017   | 1          | Im.<br>nb  | Astrocyte Function, Epigenetic Regulation                                                                                                                                            | NM_0073<br>65.2:2825    |
| CDKN1C-<br>mRNA    | 0.704            | 0.278            | 0.16                          | 1.25                          | 1.63               | 1.12                            | 2.38                            | 0.018   | 1          | Im.<br>nb  | Cell Cycle, DNA Damage                                                                                                                                                               | NM_0011<br>22631.1:1102 |
| LMNA<br>-<br>mRNA  | 0.438            | 0.181            | 0.082                         | 0.793                         | 1.35               | 1.06                            | 1.73                            | 0.024   | 1          | Im.<br>nb  | Apoptosis, Cell Cycle, Microglia Function<br>Adaptive Immune Response, Apoptosis, Cytokine Signaling, Growth Factor Signaling, Inflammatory Signaling, Innate Immune Response, NF-kB | NM_0055<br>72.2:1580    |
| IKBKG<br>-<br>mRNA | 0.278            | 0.118            | 0.0477                        | 0.509                         | 1.21               | 1.03                            | 1.42                            | 0.026   | 1          | Im.<br>nb  | Immune Response, NF-kB<br>Adaptive Immune Response, Apoptosis, Growth Factor Signaling, Inflammatory Signaling, Innate Immune Response, NF-kB                                        | NM_0036<br>39.2:470     |
| NFKBIA-<br>mRNA    | 0.448            | 0.19             | 0.0764                        | 0.82                          | 1.36               | 1.05                            | 1.77                            | 0.027   | 1          | Im.<br>nb  | Adaptive Immune Response, Apoptosis, Growth Factor Signaling, Inflammatory Signaling, Innate Immune Response, NF-kB                                                                  | NM_0205<br>29.1:945     |
| HMGB1-<br>mRNA     | 0.442            | 0.189            | 0.0721                        | 0.812                         | 1.36               | 1.05                            | 1.76                            | 0.028   | 1          | Im.<br>nb  | Apoptosis, Autophagy, Inflammatory Signaling, Innate Immune Response                                                                                                                 | NM_0021<br>28.4:2916    |
| SOCS3<br>-<br>mRNA | 0.991            | 0.424            | 0.161                         | 1.82                          | 1.99               | 1.12                            | 3.53                            | 0.028   | 1          | Im.<br>nb  | Adaptive Immune Response, Astrocyte Function, Cytokine Signaling, Inflammatory Signaling, Innate Immune Response                                                                     | NM_0039<br>55.3:1870    |
| ASH2L<br>-<br>mRNA | 0.227            | 0.0975           | 0.0355                        | 0.418                         | 1.17               | 1.02                            | 1.34                            | 0.029   | 1          | Im.<br>nb  | Epigenetic Regulation, Wnt                                                                                                                                                           | NM_0011<br>05214.2:1530 |
| ITGAV<br>-<br>mRNA | 0.338            | 0.147            | 0.0503                        | 0.626                         | 1.26               | 1.04                            | 1.54                            | 0.030   | 1          | Im.<br>nb  | Adaptive Immune Response, Angiogenesis, Autophagy, Growth Factor Signaling, Matrix Remodeling                                                                                        | NM_0022<br>10.2:2615    |
| APC-<br>mRNA       | 0.165            | 0.0723           | 0.023                         | 0.306                         | 1.12               | 1.02                            | 1.24                            | 0.032   | 1          | Im.<br>nb  | Apoptosis, Astrocyte Function, Wnt                                                                                                                                                   | NM_0000<br>38.3:6850    |
| TGFB1<br>-<br>mRNA | 0.424            | 0.19             | 0.0527                        | 0.796                         | 1.34               | 1.04                            | 1.74                            | 0.035   | 1          | Im.<br>nb  | Cell Cycle, Cytokine Signaling, Growth Factor Signaling, Matrix Remodeling, Microglia Function                                                                                       | NM_0006<br>60.3:1260    |
| C4A-<br>mRNA       | 0.778            | 0.349            | 0.0952                        | 1.46                          | 1.72               | 1.07                            | 2.75                            | 0.035   | 1          | Im.<br>nb  | Astrocyte Function                                                                                                                                                                   | NM_0072<br>93.2:1217    |
| KDM6A-<br>mRNA     | 0.443            | 0.205            | 0.0397                        | 0.845                         | 1.36               | 1.03                            | 1.8                             | 0.042   | 1          | Im.<br>nb  | Epigenetic Regulation                                                                                                                                                                | NM_0211<br>40.2:2590    |
| KCNJ10-<br>mRNA    | 0.377            | 0.175            | 0.0335                        | 0.72                          | 1.3                | 1.02                            | 1.65                            | 0.042   | 1          | Im.<br>nb  | Astrocyte Function, Neurons and Neurotransmission                                                                                                                                    | NM_0022<br>41.4:4740    |



# Supplementary figure 1

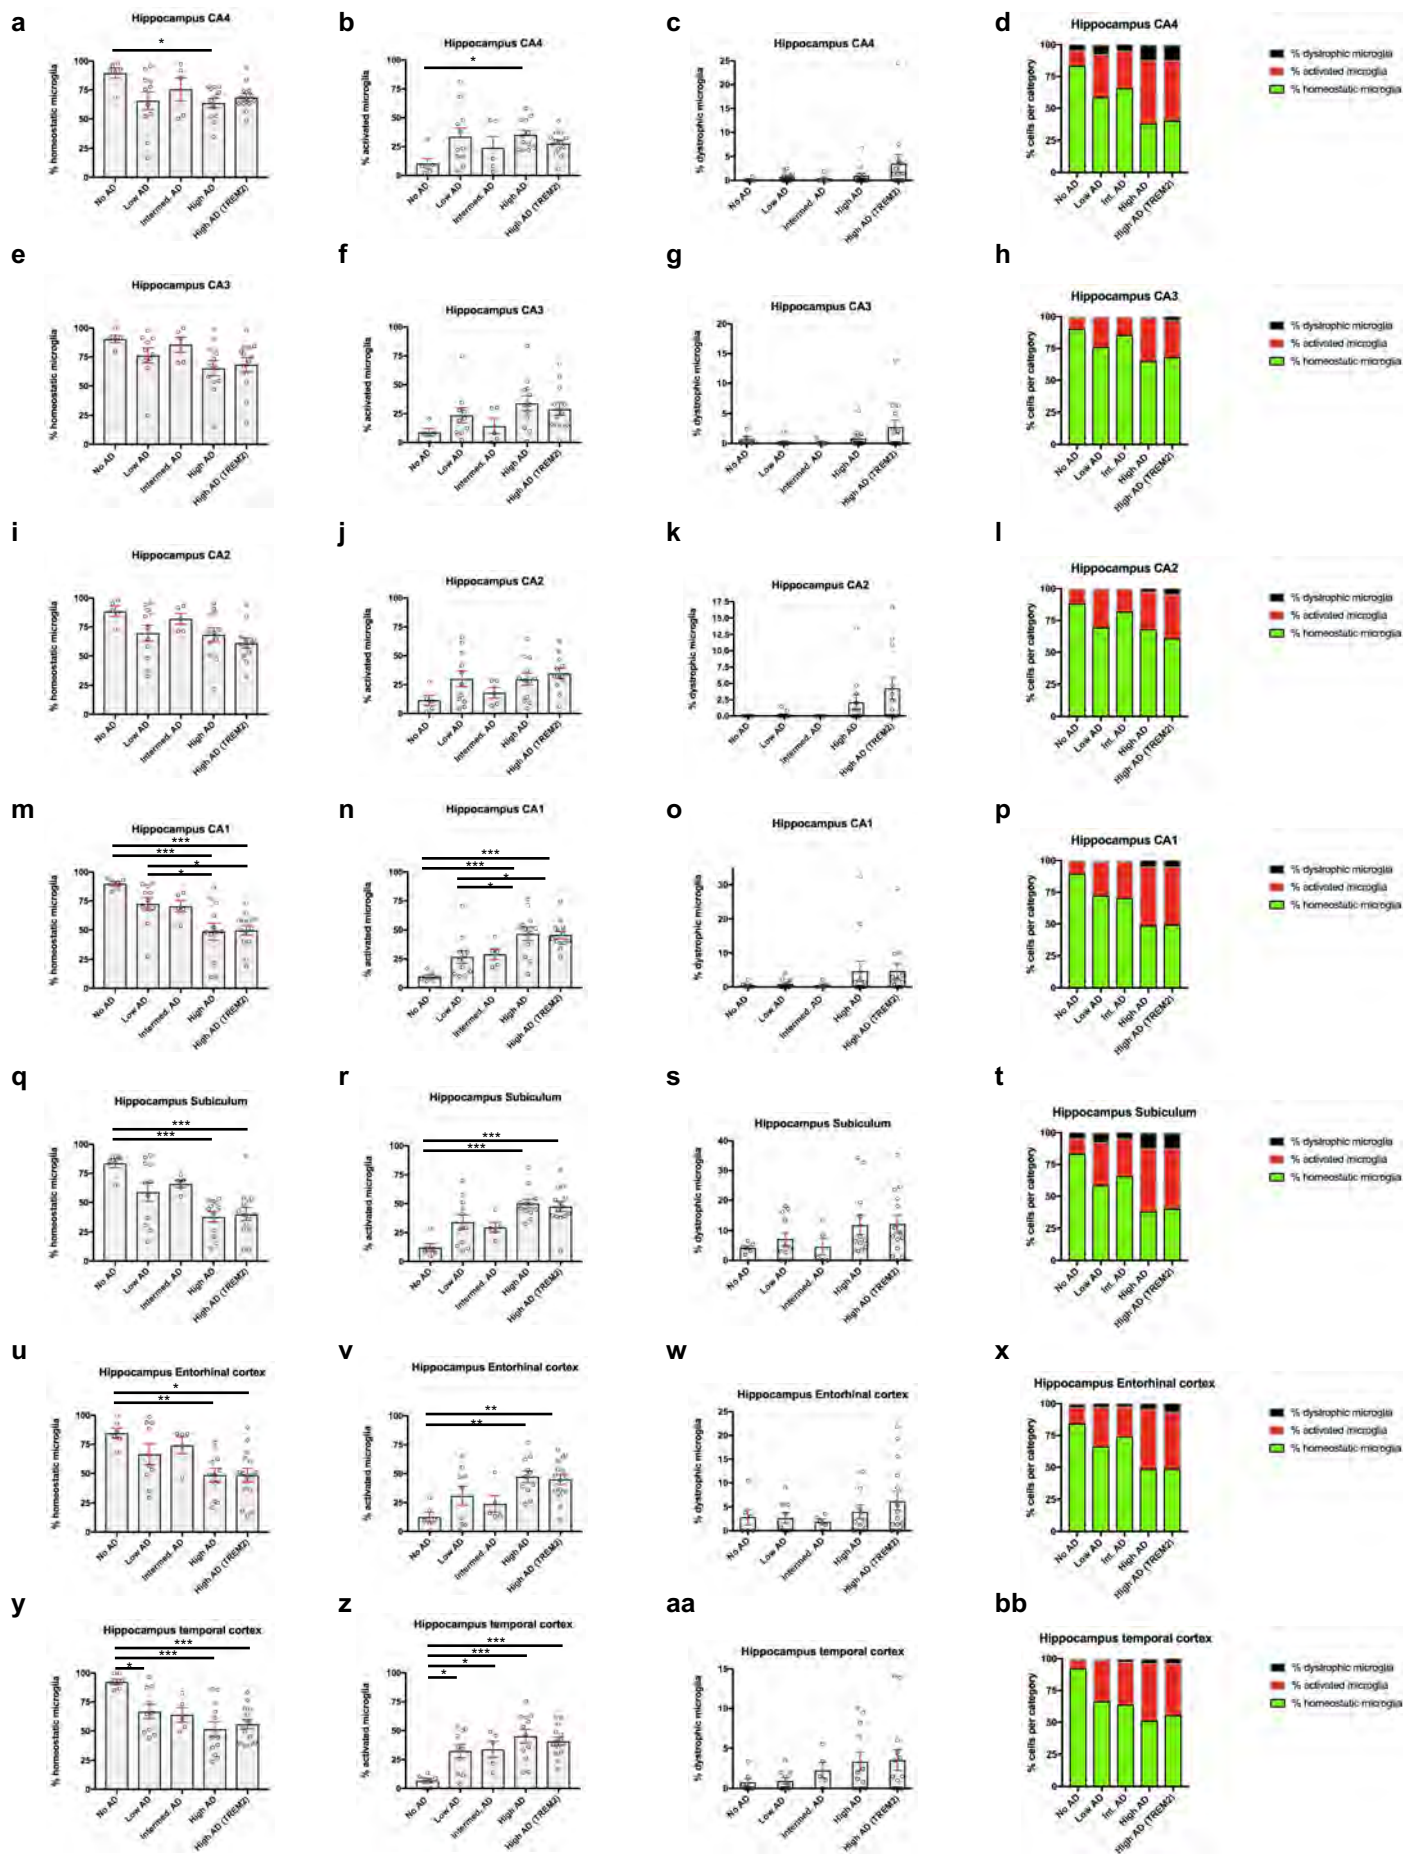

**Supplementary figure 2**

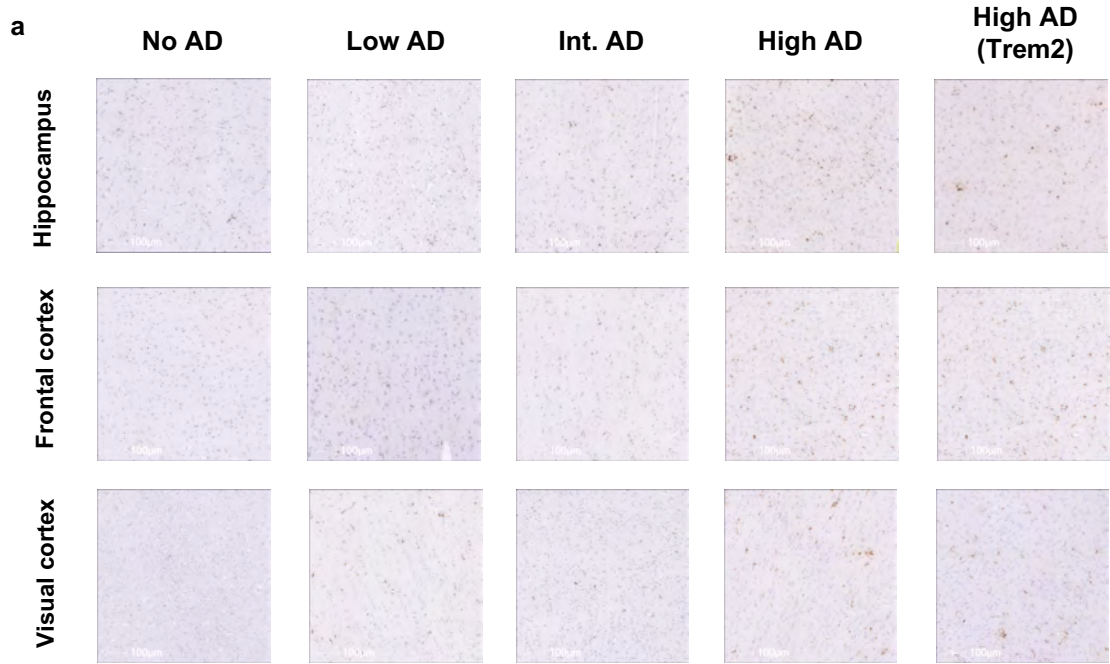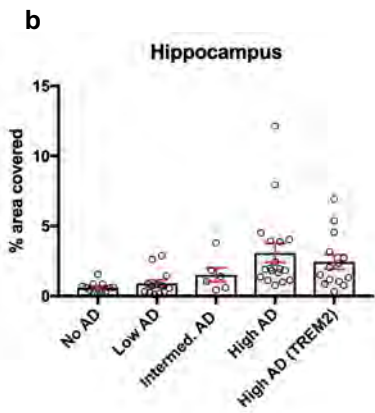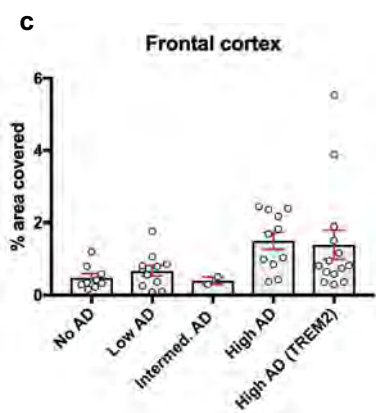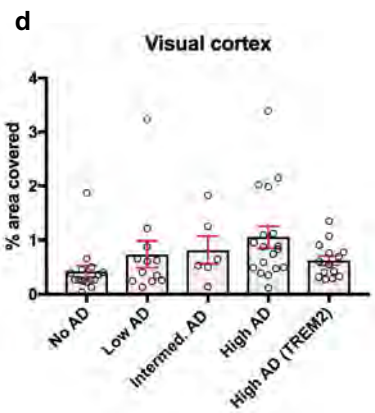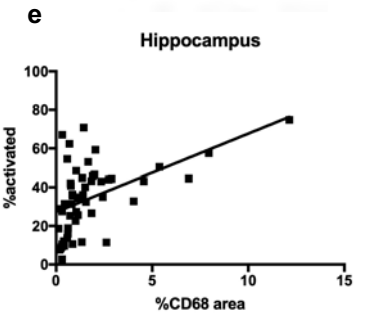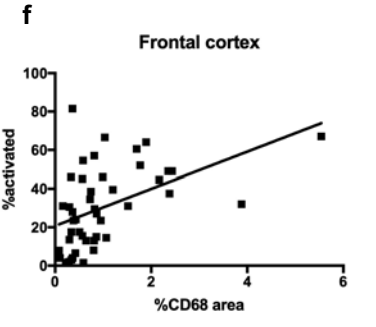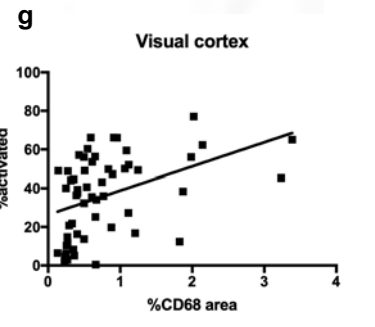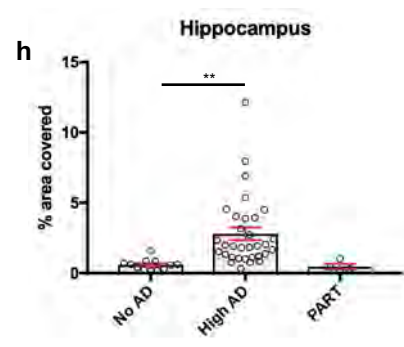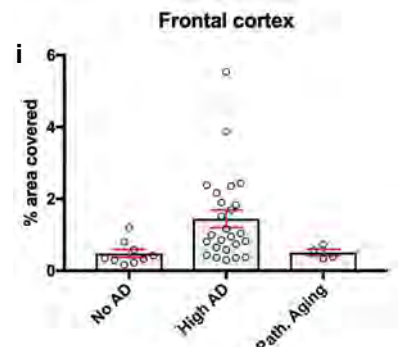

Supplementary figure 3

a

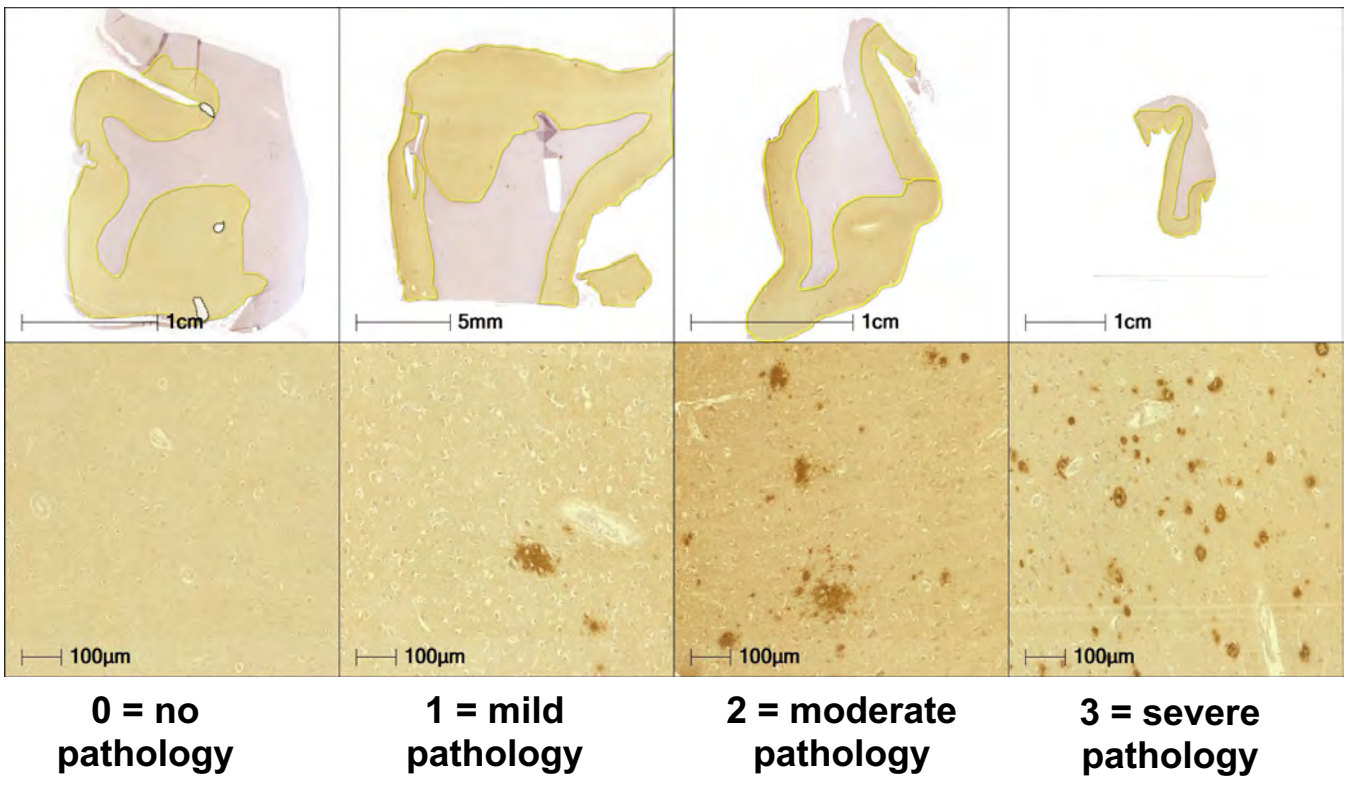

b

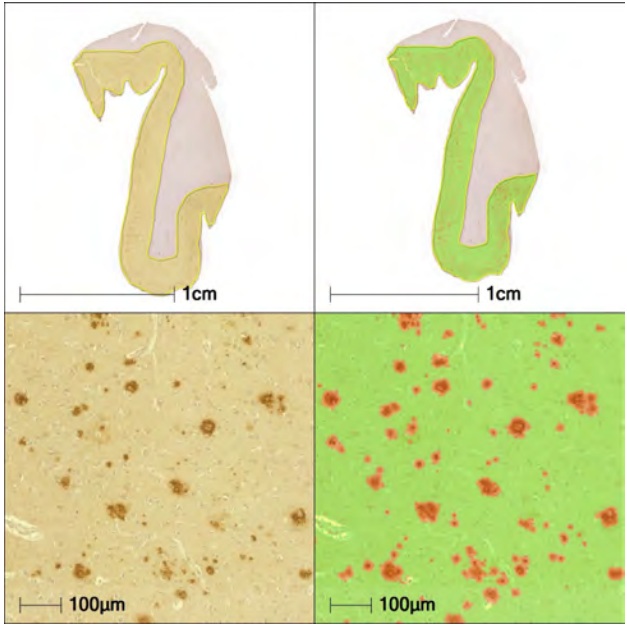

c

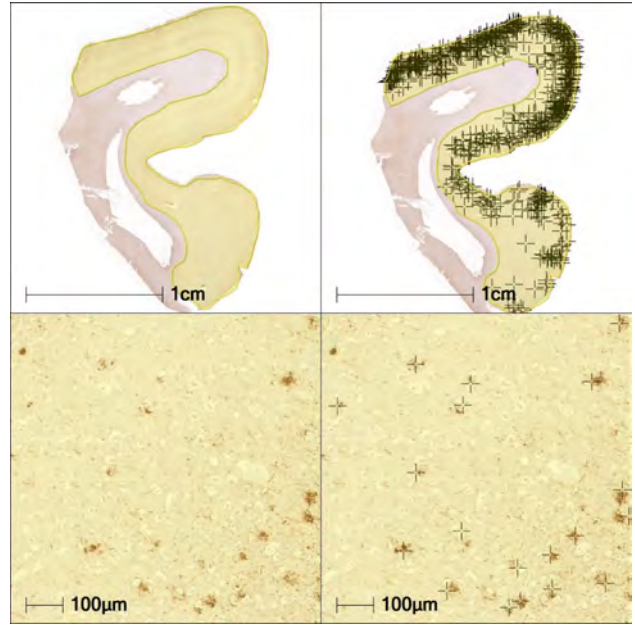

Supplementary figure 4

a

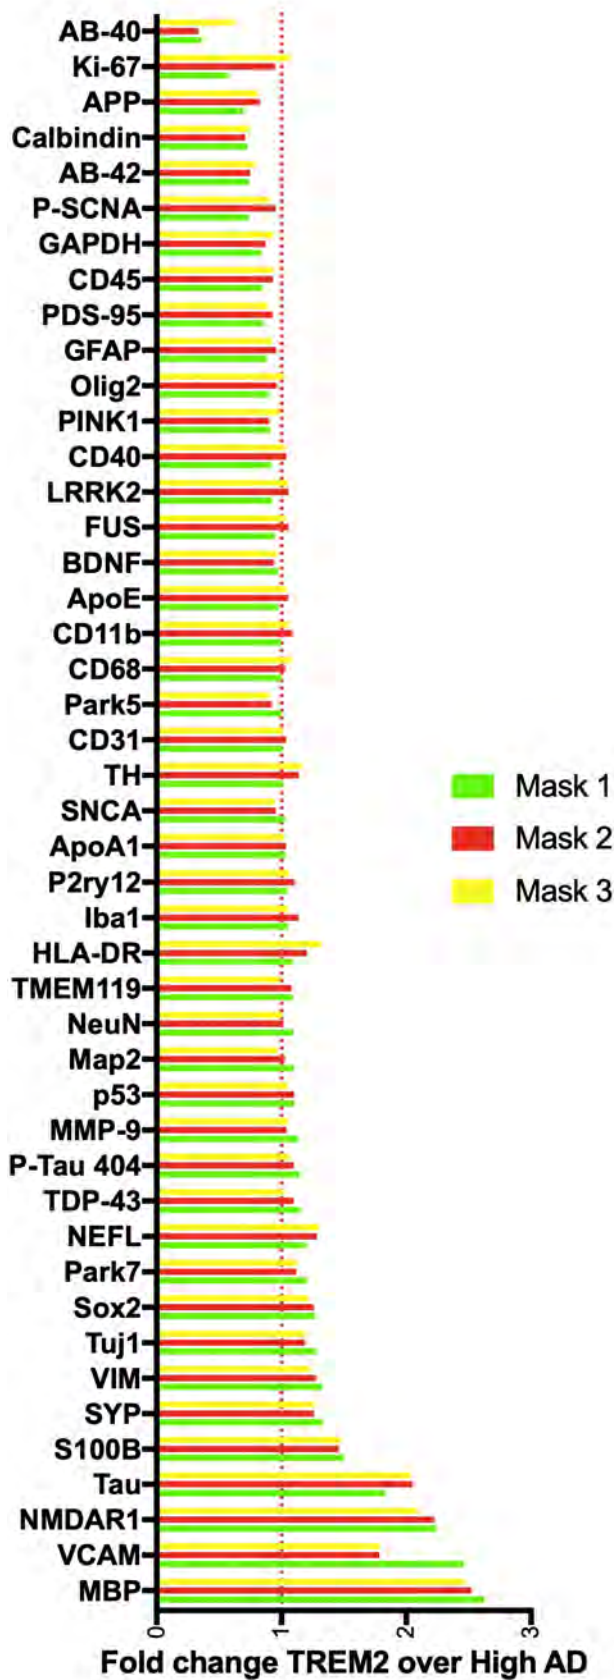

b

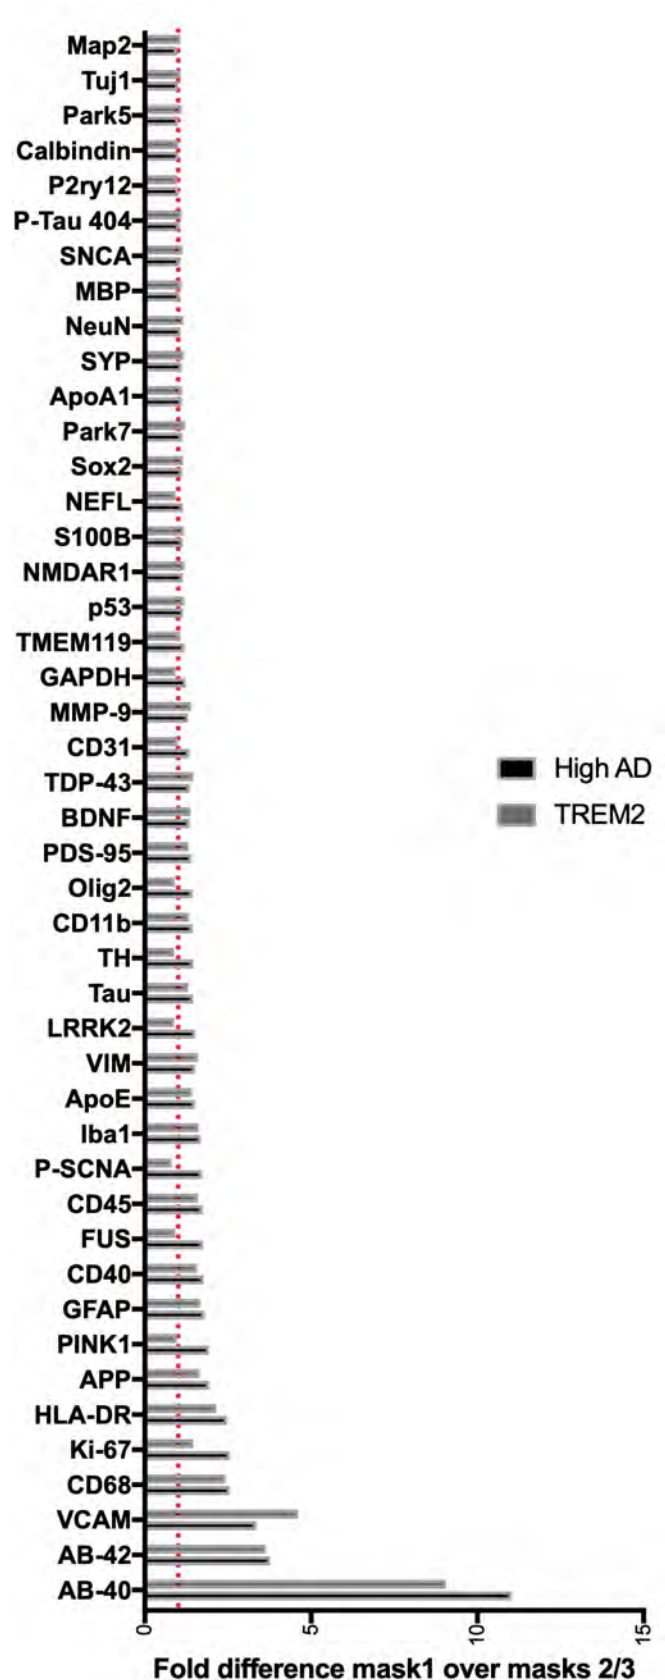

Supplementary figure 5

a

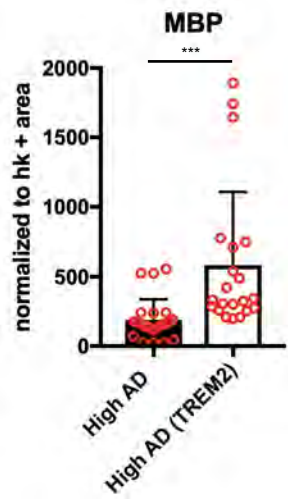

b

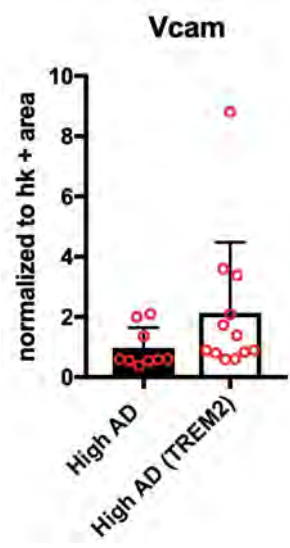

c

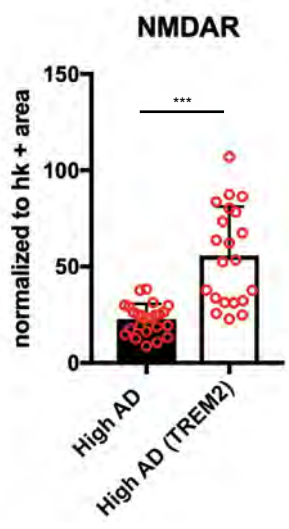

d

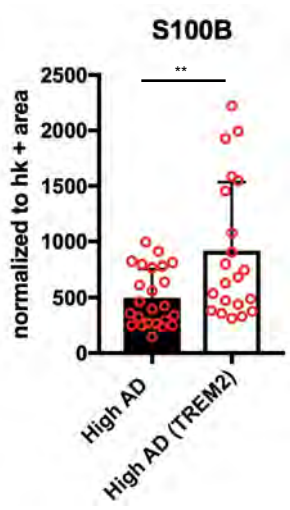

e

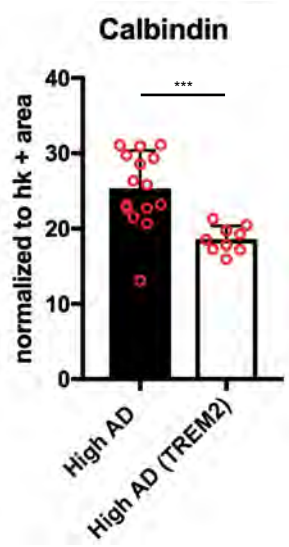





Supplementary figure 7

Neuropathology panel

Neuroinflammation panel

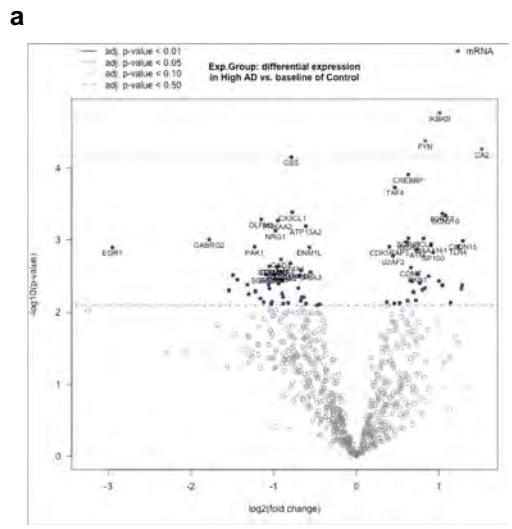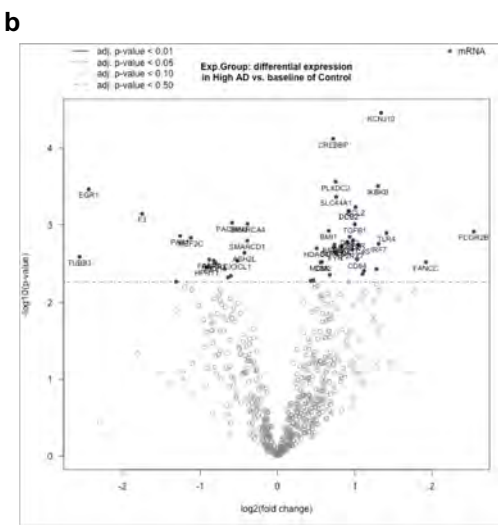

Hippocampus

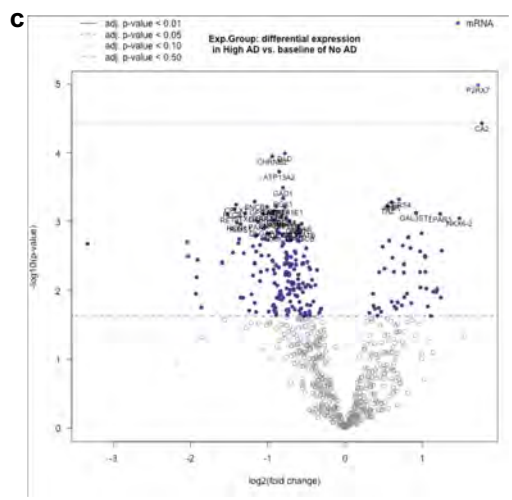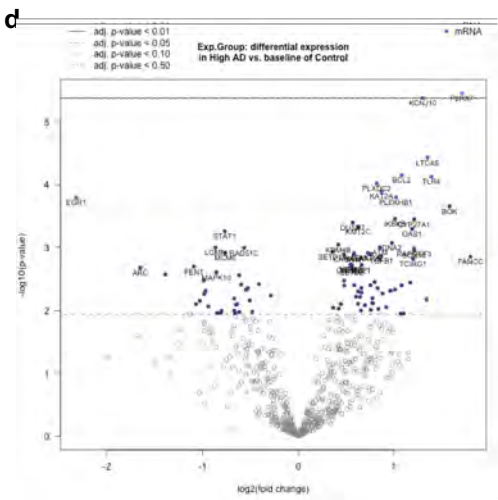

Frontal cortex

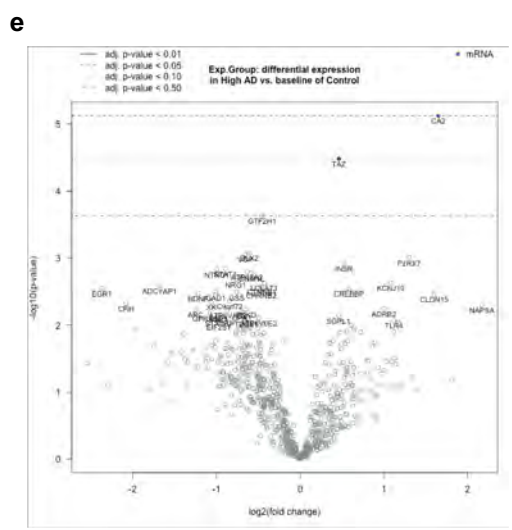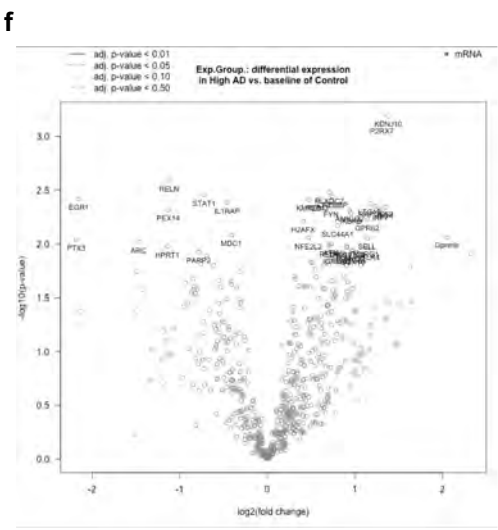

Visual cortex

# Supplementary figure 8

## Neuropathology panel

## Neuroinflammation panel

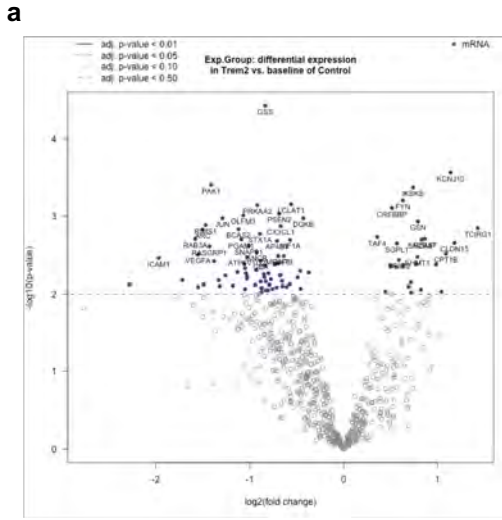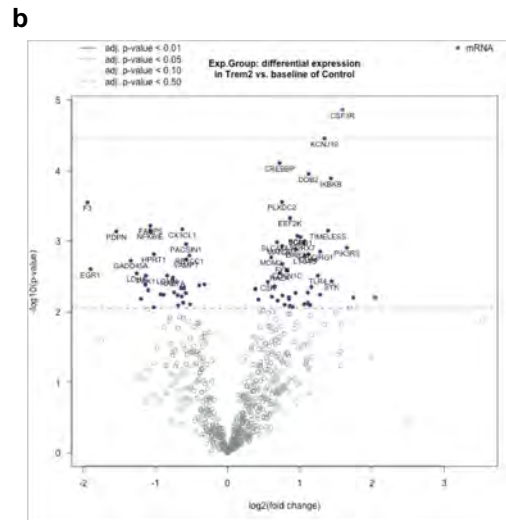

Hippocampus

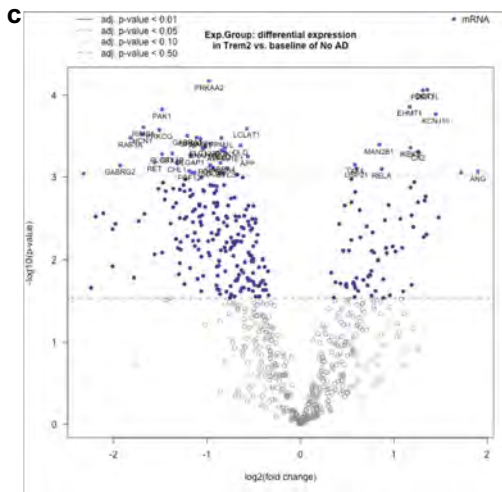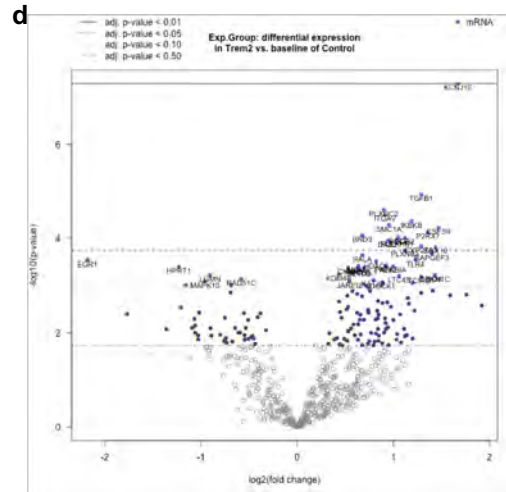

Frontal cortex

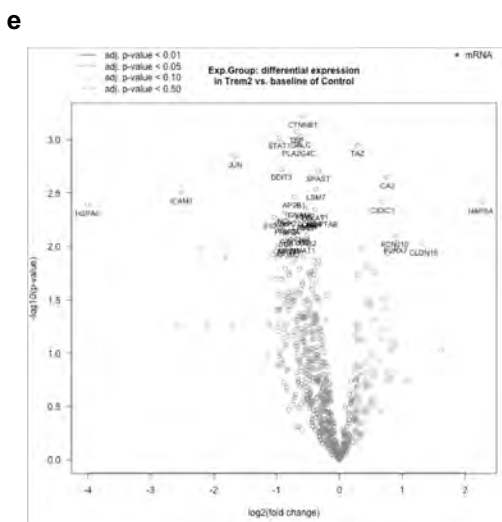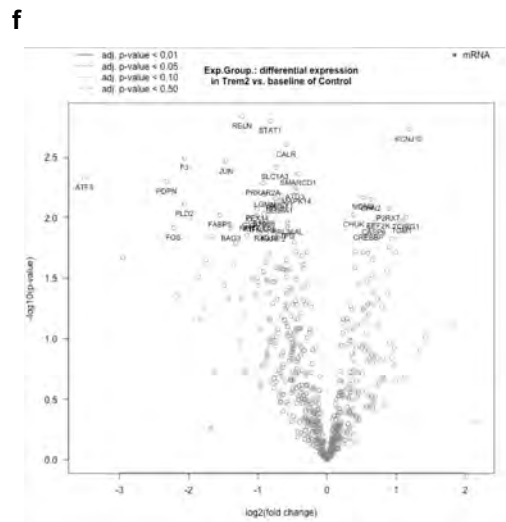

Visual cortex

Supplementary figure 9

Neuropathology panel

Neuroinflammation panel

a

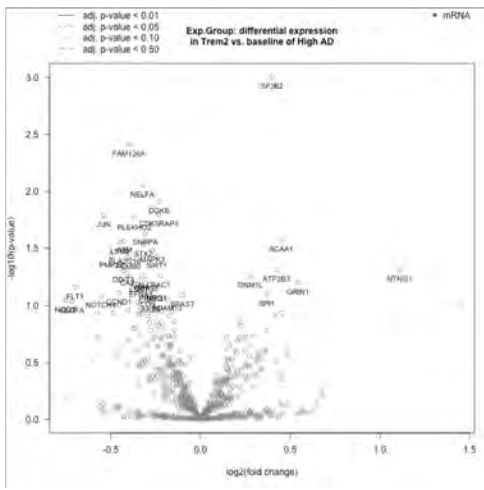

b

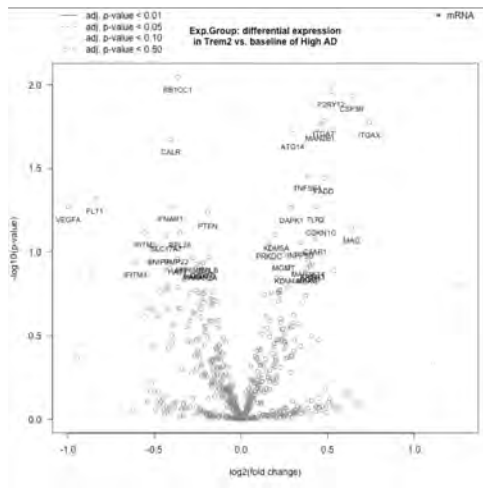

Hippocampus

c

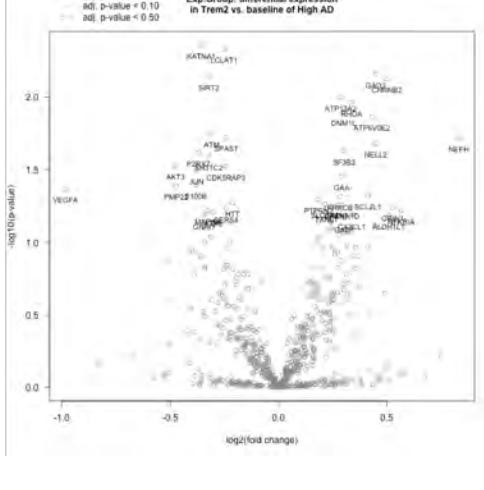

d

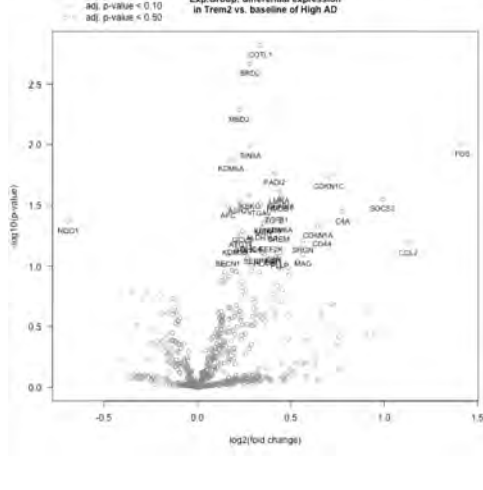

Frontal cortex

e

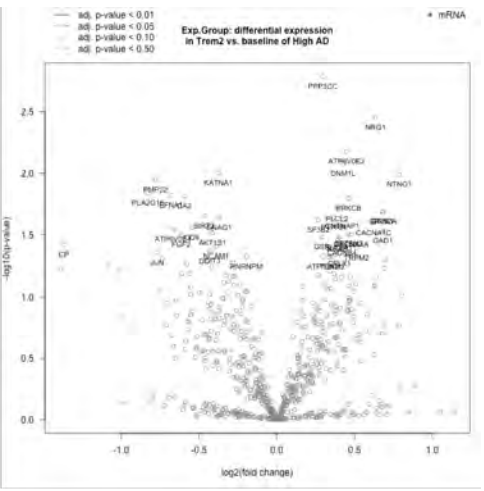

f

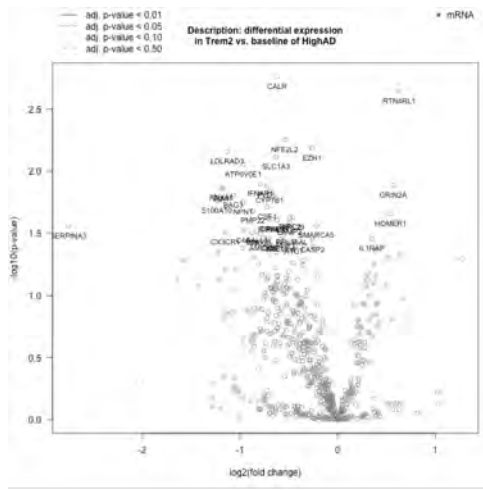

Visual cortex
